# Supplementary material
Source: PubMed Central journal article supplement (PMC4490055)
Supplement: NIHMS660345-supplement-01.pdf [file NIHMS660345-supplement-01.pdf]

**SUPPLEMENTAL TABLE A. Comparison of participants with and without data on serum creatinine and/or urine albumin-to-creatinine ratio**

|                          | Analytic group<br><i>N</i> =9797 |              | All participants from Delhi & Chennai<br><i>N</i> =12 271 |              |
|--------------------------|----------------------------------|--------------|-----------------------------------------------------------|--------------|
|                          | Mean ± SD or N (%)               |              | Mean ± SD or N (%)                                        |              |
|                          | <i>Men</i>                       | <i>Women</i> | <i>Men</i>                                                | <i>Women</i> |
| <b>Demographics</b>      | 4559 (44)                        | 5238 (56)    | 5869 (48)                                                 | 6402 (52)    |
| Mean age (years)         | 44.0 ± 13.8                      | 40.4 ± 12.1  | 43.7 ± 13.5                                               | 41.8 ± 12.7  |
| 20 to 44                 | 2488 (55)                        | 3163 (60)    | 3265 (56)                                                 | 3892 (61)    |
| 45 to 64                 | 1702 (37)                        | 1786 (34)    | 2130 (36)                                                 | 2143 (33)    |
| ≥ 65                     | 369 (8)                          | 289 (6)      | 474 (8)                                                   | 367 (6)      |
| Education (years)        |                                  |              |                                                           |              |
| <1 to 4                  | 557 (12)                         | 1231 (24)    | 752 (13)                                                  | 1575 (25)    |
| 5 to 12                  | 3016 (66)                        | 3262 (62)    | 3862 (66)                                                 | 3877 (60)    |
| ≥ 12                     | 986 (22)                         | 745 (14)     | 1255 (21)                                                 | 950 (15)     |
| Occupation               |                                  |              |                                                           |              |
| Not working <sup>#</sup> | 670 (15)                         | 4431 (85)    | 863 (15)                                                  | 5393 (84)    |
| Unskilled & semiskilled  | 1682 (37)                        | 448 (8)      | 2179 (37)                                                 | 550 (9)      |
| Skilled                  | 1939 (42)                        | 329 (6)      | 2462 (42)                                                 | 419 (6)      |
| White collar             | 268 (6)                          | 30 (1)       | 365 (6)                                                   | 40 (1)       |
| Asset index              |                                  |              |                                                           |              |
| Low                      | 1636 (36)                        | 2050 (39)    | 2197 (37)                                                 | 2524 (39)    |
| Medium                   | 1458 (32)                        | 1672 (32)    | 1842 (31)                                                 | 1971 (31)    |
| High                     | 1465 (32)                        | 1515 (29)    | 1831 (31)                                                 | 1906 (30)    |
| Current tobacco use      | 1736 (38)                        | 249 (5)      | 2326 (40)                                                 | 316 (5)      |

Overall, the analytic group is generally representative of the all CARRS participants from Delhi and Chennai. However, men were less likely to provide data on serum creatinine and/or urine albumin-to-creatinine ratio; men in the analytic group were also less likely to endorse using tobacco. Women in the analytic group were slightly younger and more likely to have received 5 to 12 years of education.

Definitions:

<sup>#</sup>Not working category includes home-makers or retired participants.

(i) Chennai Households

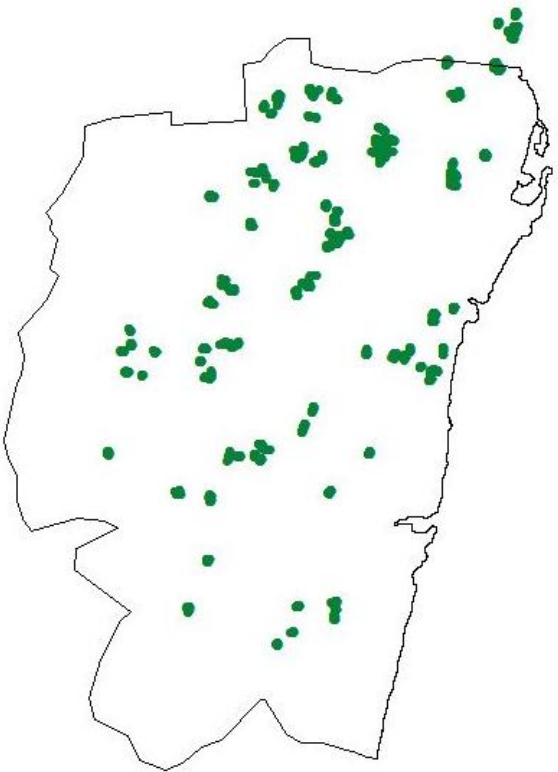

(ii) Delhi Households

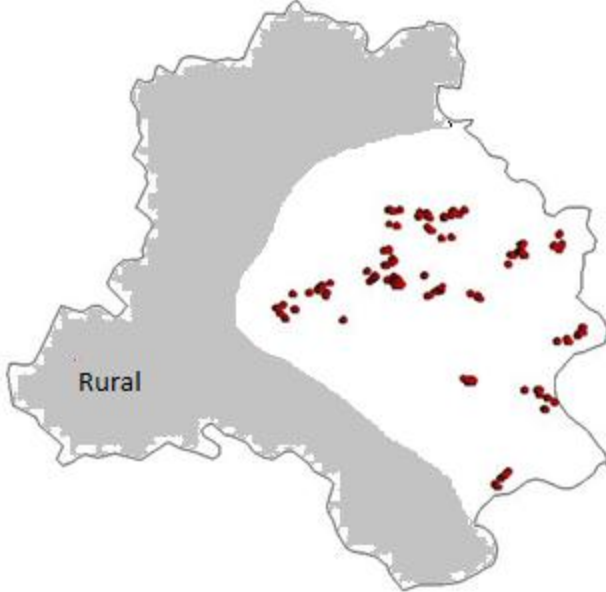

Supplemental Figure A (i-ii).  
Map of surveyed households overlaid on maps of Chennai and Delhi.

**Women in Chennai**

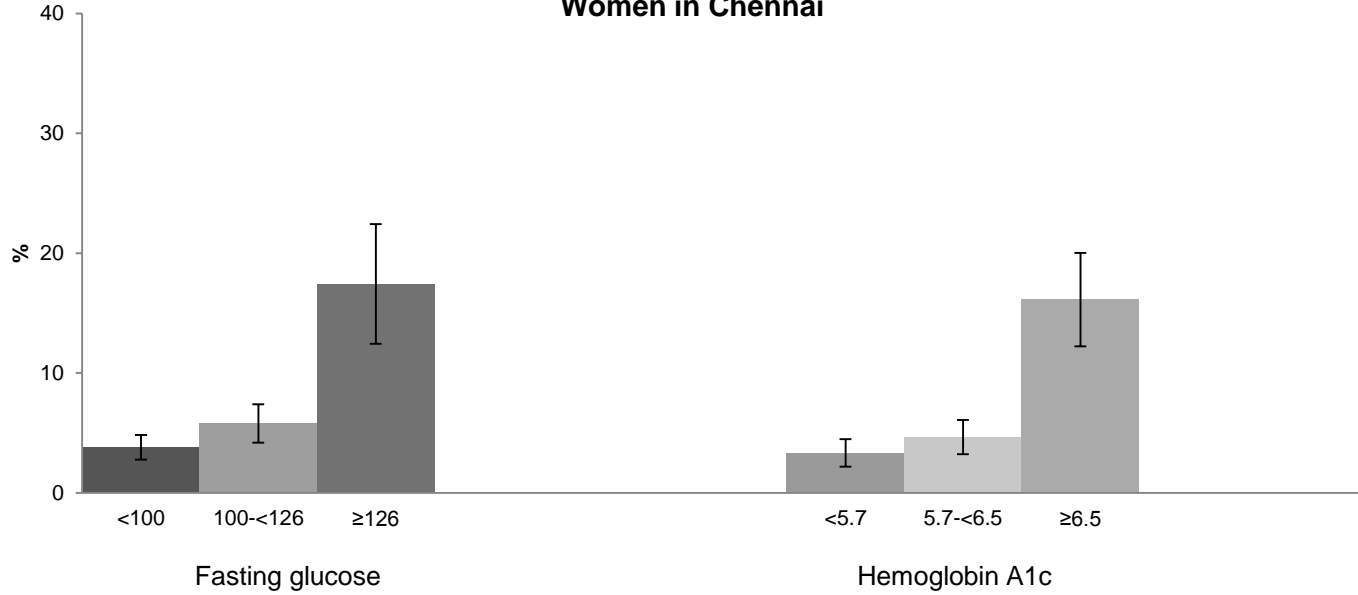

**Women in Delhi**

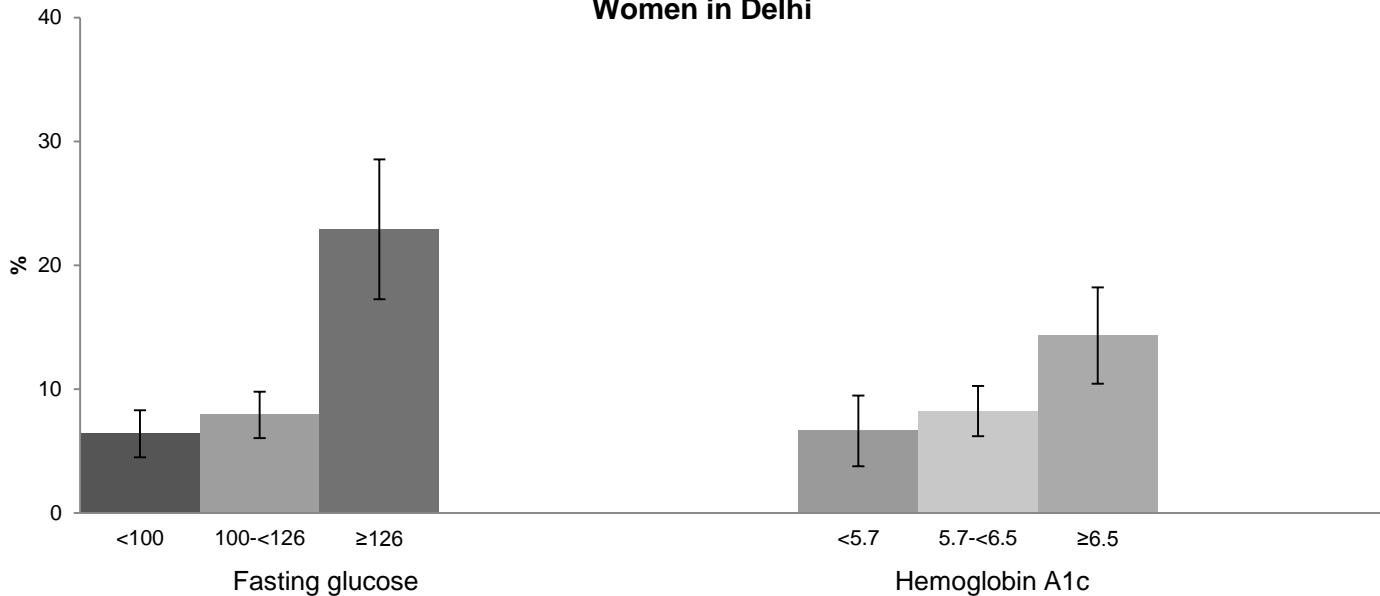

**Supplemental Figure B (i-iv) CKD prevalence in the CARRS study according to measures of diabetes.**

Error bars represent 95% confidence intervals. Prevalence of CKD was notably higher when participants had FG or A1c in the diabetes range compared with participants with normal values (prevalence difference for FG: 14.2% [95% CI: 11.6-16.8%]; prevalence difference for A1c: 11.2% [95% CI: 9.0-13.4%]).

CKD prevalence was slightly higher in women with FG in the pre-diabetes range compared with women with normal FG (prevalence difference for FG: 2.2% [95% CI: 0.6-3.8%] prevalence difference for women for A1c: 1.6% [95% CI: -0.03-3.5]). No significant prevalence difference was observed among men in these categories.

Abbreviations: CARRS-Center for Cardiometabolic Risk Reduction in South Asia; CKD-Chronic kidney disease. FG-Fasting glucose in mg/dL.

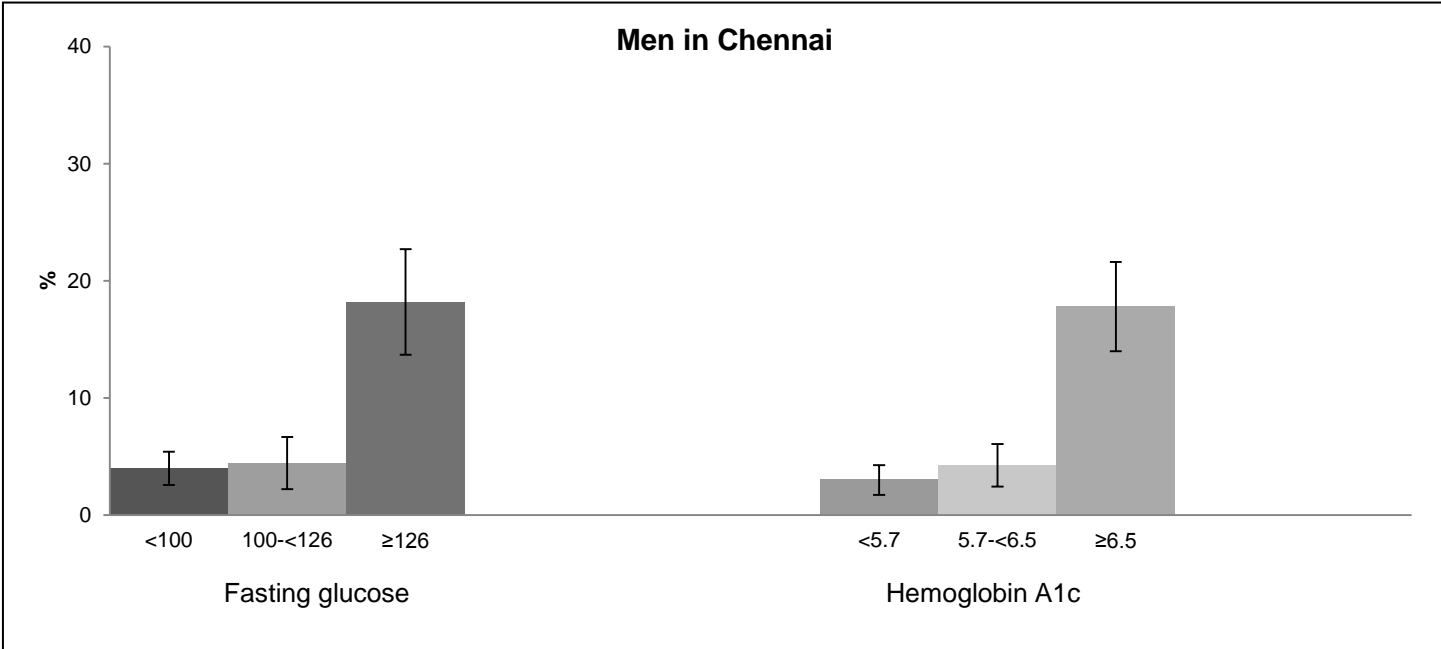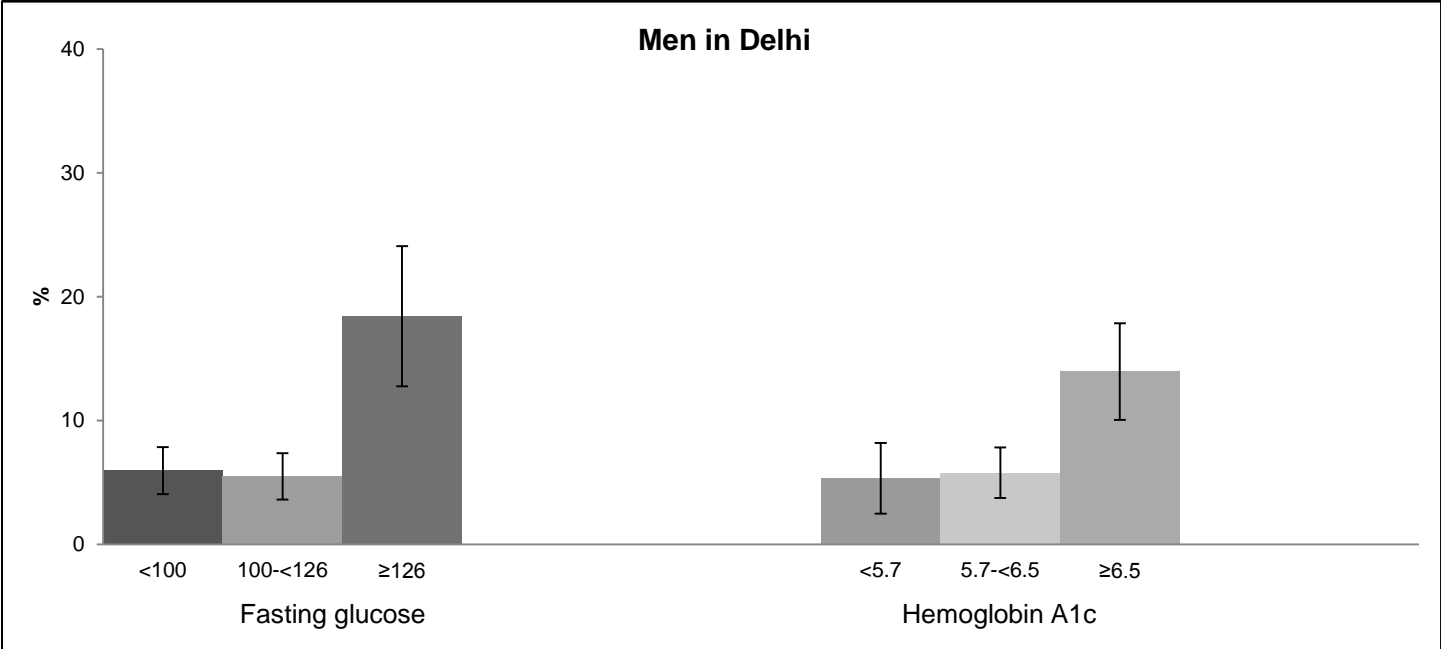

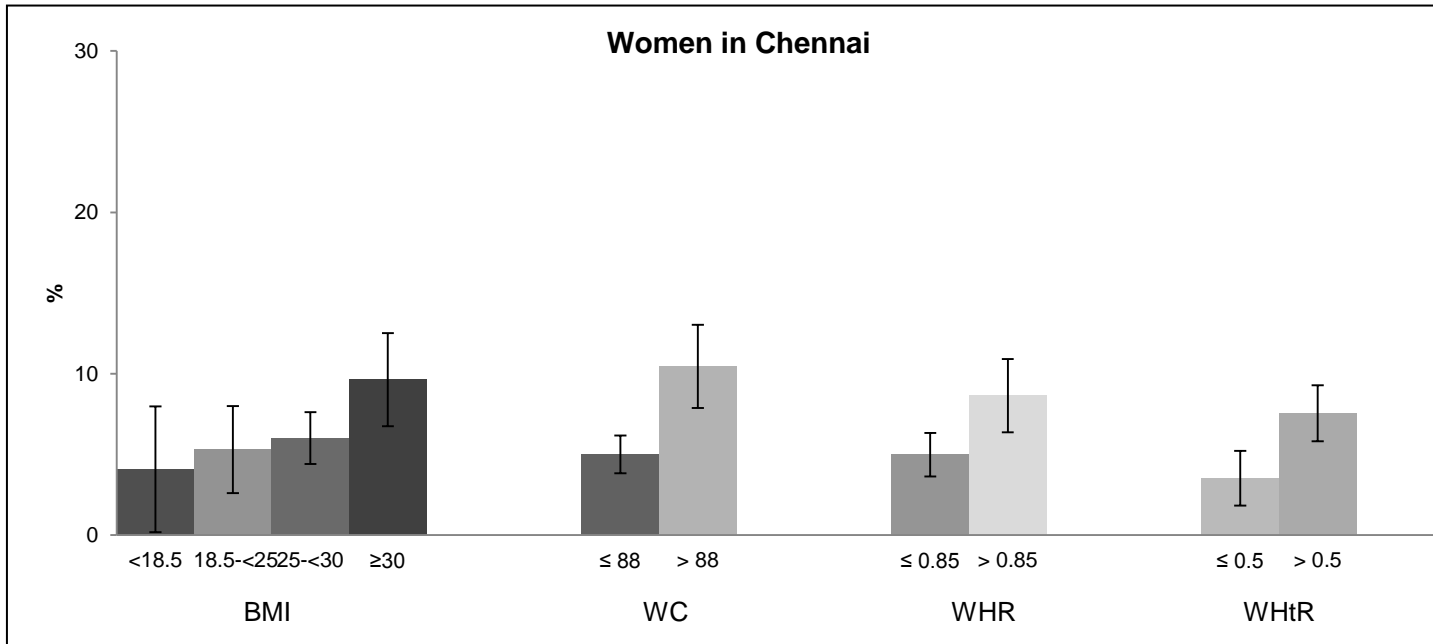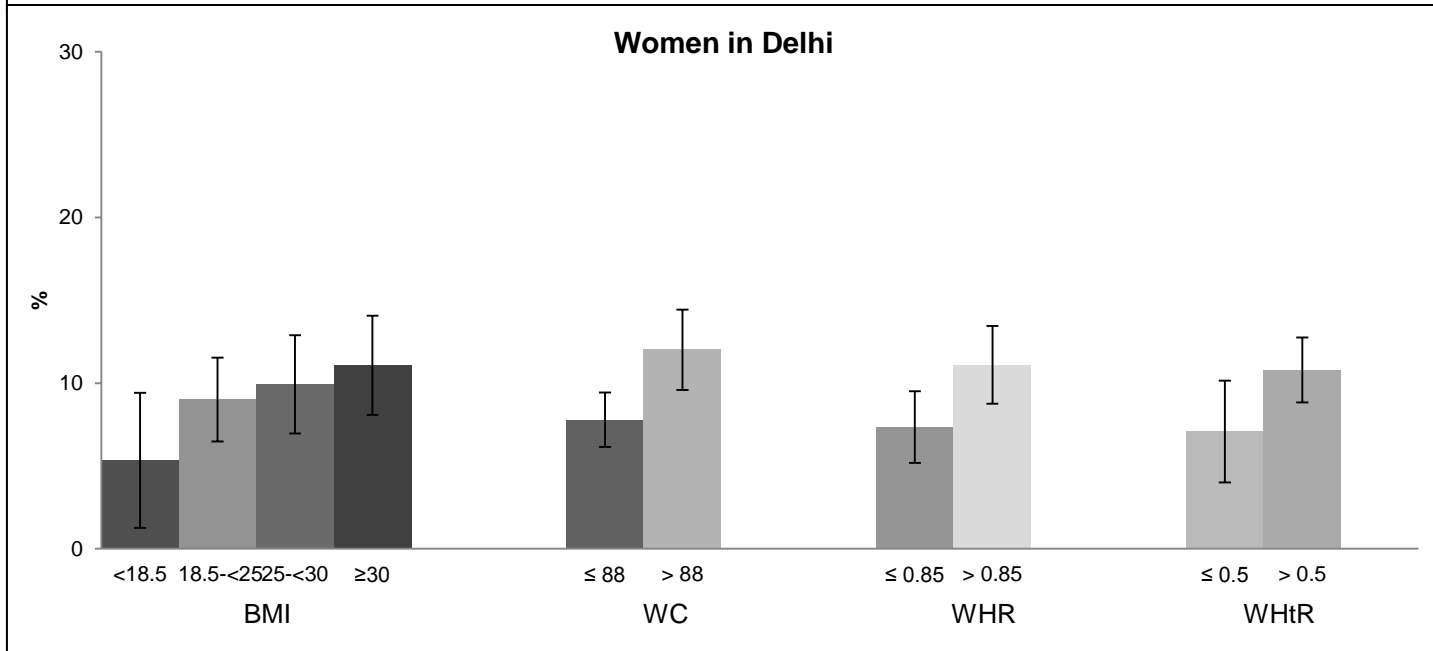

**Supplemental Figure C i-iv: CKD prevalence in the CARRS study according to measures of obesity.** Error bars represent 95% confidence intervals. No single marker of obesity was consistently associated with significantly higher prevalence of CKD across the city- and sex-stratified subgroups.

Abbreviations: CARRS-Center for Cardiometabolic Risk Reduction in South Asia; CKD-Chronic kidney disease; BMI-body mass index (in kg/m<sup>2</sup>); WC-waist circumference (in cm); WHR-Waist-to-hip ratio; WHtR-waist-to-height ratio.

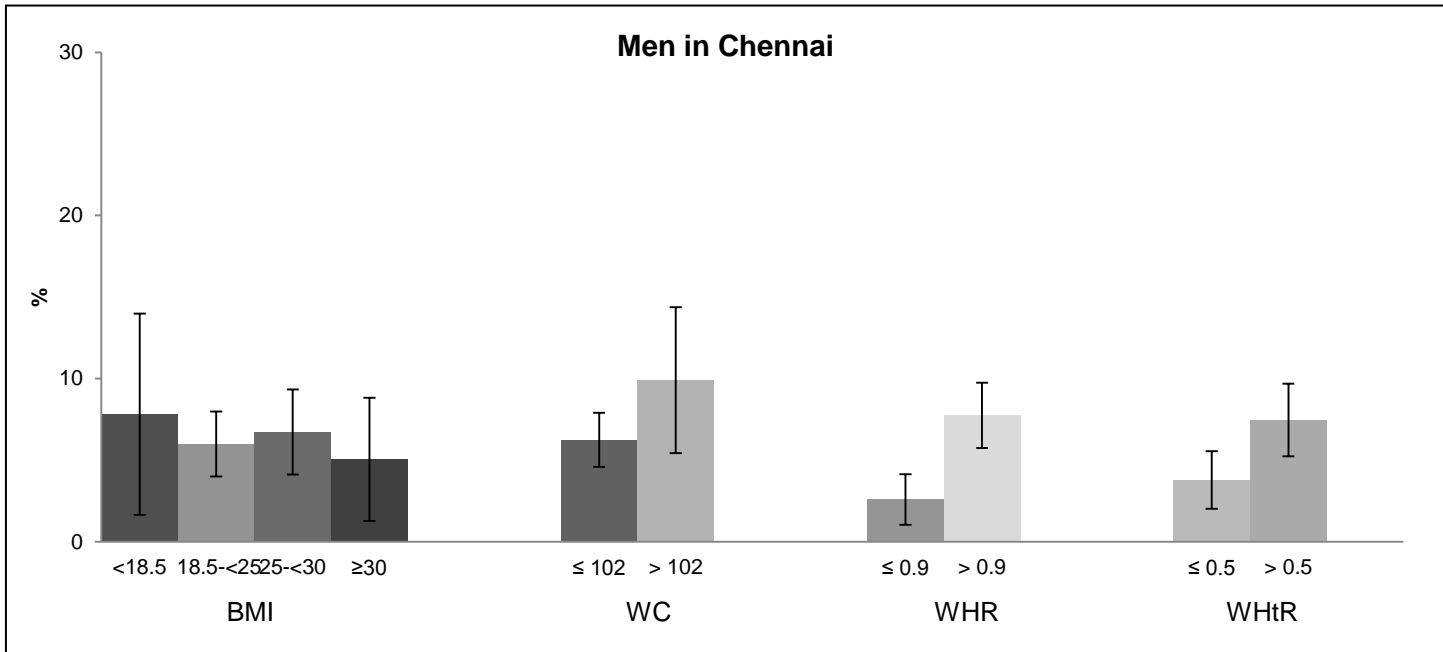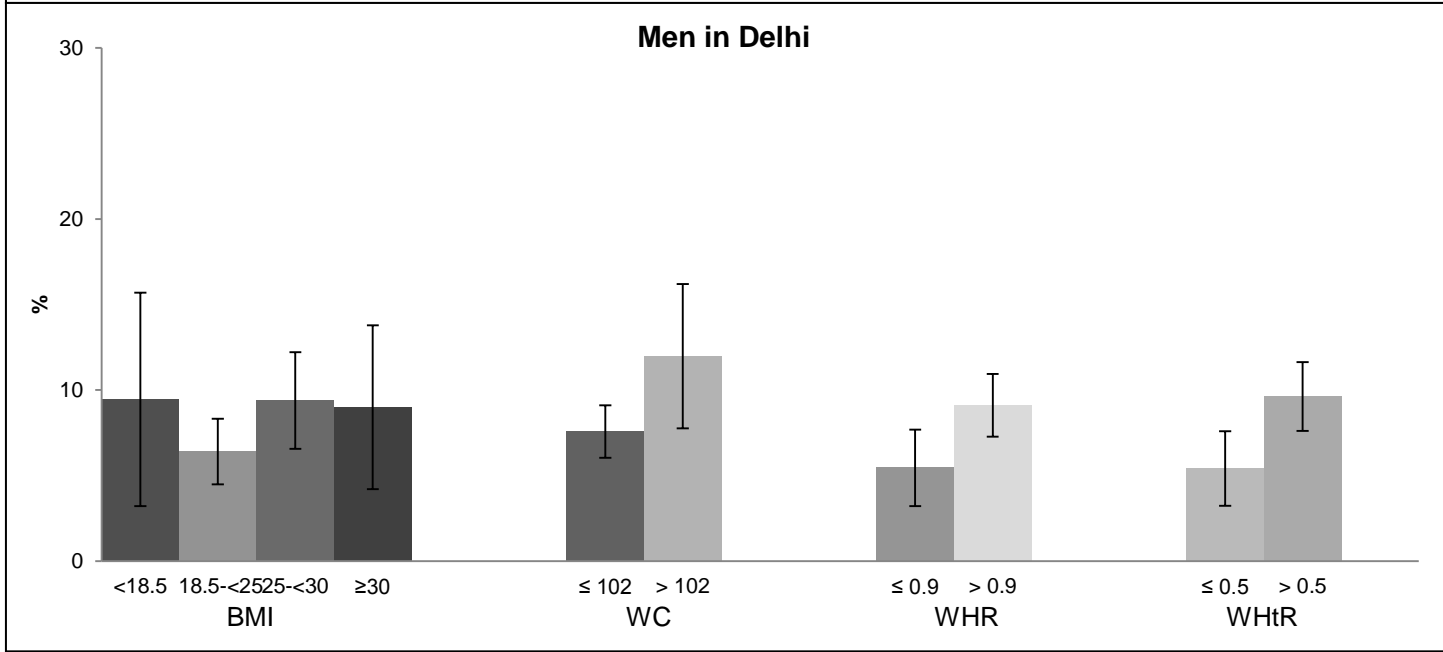

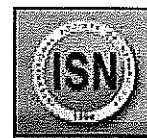

## LICENCE TO PUBLISH

Manuscript #: KI-05-14-0827.R1

**Kidney International**

Title of the contribution: Prevalence of chronic kidney disease in two major Indian cities and projections for associated cardiovascular disease: the Cardiometabolic Risk Reduction in South Asia surveillance study

Author(s): (names only)  
("the Authors")

Shuchi Anand, Roopa Shivashankar, Mohammed K. Ali, Dimple Kondal, B. Binukumar, Maria E Montez-Rath, Vamadevan S. Ajay  
R. Pradeepa, M. Deepa, Ruby Gupta, Viswanathan Mohan, K.M. Venkat Narayan, Nikhil Tandon, Glenn M. Chertow, and Dorairaj Prabhakaran

To: International Society of Nephrology ("ISN")

1. In consideration of ISN agreeing to publish the Contribution the Authors grant to ISN for the full term of copyright in the Contribution and any extensions thereto, subject to clause 2 below, the exclusive licence (a) to publish, reproduce, distribute, display and store the Contribution in all forms, formats and media whether now known or hereafter developed (including without limitation in print, digital and electronic form) throughout the world, (b) to translate the Contribution into other languages, create adaptations, summaries or extracts of the Contribution or other derivative works based on the Contribution and exercise all of the rights set forth in (a) above in such translations, adaptations, summaries, extracts and derivative works and (c) to license others to do any or all of the above.
2. Ownership of copyright remains with the Authors, and provided that, when reproducing the Contribution or extracts from it, the Authors acknowledge first and reference publication in the Journal, the Authors retain the following non-exclusive rights:
  - a) To reproduce the Contribution in whole or in part in any printed volume (book or thesis) of which they are the author(s).
  - b) They and any academic institution where they work at the time may reproduce the Contribution for the purpose of course teaching.
  - c) To post a copy of the Contribution as accepted for publication after peer review (in Word or Tex format) on the Author's own web site, or the Author's institutional repository, or the Author's funding body's archive, six months after publication of the printed or online edition of the Journal, provided that they also link to the Journal article on NPG's web site (eg through the DOI).
  - d) To reuse figures or tables created by them and contained in the Contribution in other works created by them.
3. The Authors warrant and represent that:
  - a) The Authors are the sole authors of and sole owners of the copyright in the Contribution. If the Contribution includes materials of others, the Authors have obtained the permission of the owners of the copyright in all such materials to enable them to grant the rights contained herein. Copies of all such permissions are attached to this licence.
  - b) All of the facts contained in the Contribution are true and accurate.
  - c) The Author who has signed this Agreement has full right, power and authority to enter into this Agreement on behalf of all of the Authors. All the listed Authors have agreed to be listed Authors, and have granted the signing Author the Authority to enter into this agreement on their behalf.
  - d) Nothing in the Contribution is obscene, defamatory, libelous, violates any right of privacy or infringes any intellectual property rights (including without limitation copyright, patent or trademark) or any other human, personal or other rights of any person or entity or is otherwise unlawful.
  - e) Nothing in the Contribution infringes any duty of confidentiality which any of the Authors may owe to anyone else or violates any contract, express or implied, of any of the Authors, and all of the institutions in which work recorded in the Contribution was carried out have authorised publication of the Contribution.
4. The Authors authorise ISN to take such steps as it considers necessary at its own expense in the Authors' name and on their behalf if it believes that a third party is infringing or is likely to infringe copyright in the Contribution.

This Agreement and the rights and liabilities of the parties with respect to this Agreement and its subject matter, shall be governed by the laws of the State of New York, without reference to the principles of conflicts of laws thereof.

Signed for and on behalf of the Authors: 

Date: Dec 22, 2014

Please print name: Dorairaj Prabhakaran

Address:

Public Health Foundation of India, 4th floor, Plot No 47, Sector 44, Gurgaon 122002, Haryana, India. Phone+911244781 email:dprabhakaran@codcindia.org

Please return this form to: Kidney International (St. Louis office), Attn: Patricia Morrissey, Executive Managing Editor, Department of Medicine, Washington University School of Medicine, Mail Stop 90-31-666, 216 South Kingshighway Boulevard, St. Louis, MO 63110, USA. Fax: +1 314 454 8907
